# Supplementary material
Source: publisher site journal article supplement (https://www.dovepress.com/article/supplementary_file/499999/499999.docx)
Supplement: Supplementary file 1 [file 499999.docx]

Supplementary 1. Patient's Laboratory Profile

| **Parameter** | **Value** | **References** |
| --- | --- | --- |
| Hb | 8,1 | 10,85 - 14,90 g/dL |
| Leukocyte (WBC) | 12,21 | 4,79 - 11,34 103/mm3 |
| Thrombocyte (PLT) | 143 | 216,0 - 451,0 103/mm3 |
| MCV | 84,4 | 71,80 - 92,00 μm3 |
| MCH | 26,9 | 22,60 - 31,01 pg |
| RDW | 17,3 | 11,30 - 14,60 % |
| C3 | 52 | 90-180 mg/dL |
| C4 | 9.8 | 10-40 mg/dL |
| Anti Cardiolipin IgM | 0.7 | Normal < 7 MPL U/mL |
| Anti Cardiolipin IgG | 1.0 | Normal <10 GPL U/mL |
| Anti ds-DNA Total | 16,7 | <25 U/mL |
| ANA (IF) | >1:1000 | <1:80 |
